# Supplementary material for: Association of Circulating Tumor Cells with Inflammatory and Biomarkers in the Blood of Patients with Metastatic Castration-Resistant Prostate Cancer
Source: MDPI journal article supplement (doi:10.3390/life11070664), 2021-07-06
Supplement: s1 [file s1]

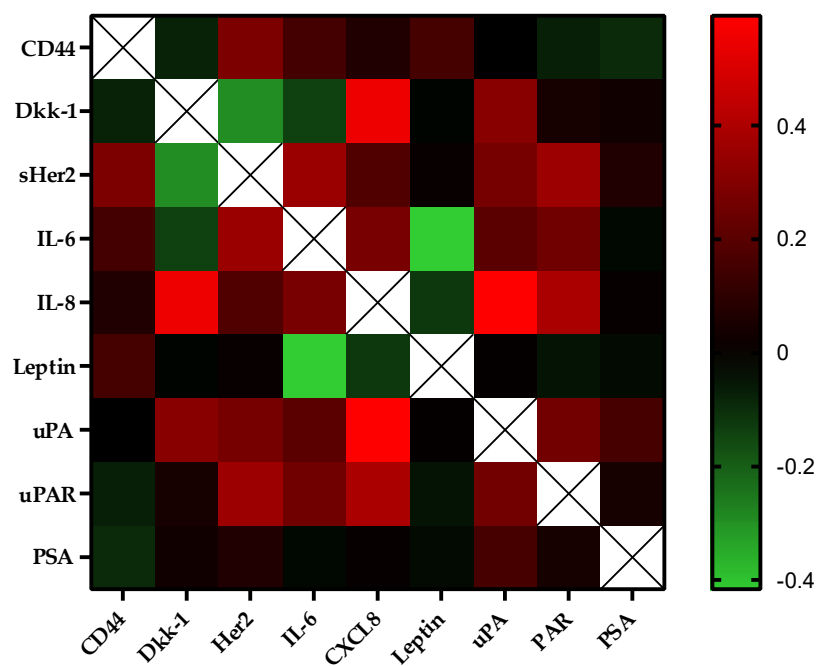

**Figure S1.** Heatmap of non-significant correlation coefficients (Spearman) among biomarkers of localized prostate cancer patients. The color-coded correlation is on the left, where red demonstrates a strong positive correlation and light green indicates a strong negative correlation.
